# Supplementary material for: Family Support as Smoking Prevention during Transition from Early to Late Adolescence: A Study in 42 Countries
Source: MDPI journal article supplement (doi:10.3390/ijerph182312739), 2021-12-02
Supplement: s1 [file s1]

**Table S1.** Country-level data on smoking prevalence, family support, and the association of these factors

| No | Country              | V1     | V2   | V3    | V4    | V4    | V6    | V7    | V8    | V9    |
|----|----------------------|--------|------|-------|-------|-------|-------|-------|-------|-------|
| 1  | Albania              | 1634   | 2.86 | 87.60 | 86.10 | 88.80 | 87.10 | 87.60 | 84.60 | 94.20 |
| 2  | Armenia              | 3774   | 1.24 | 77.80 | 75.10 | 80.20 | 78.40 | 74.20 | 72.80 | 80.70 |
| 3  | Austria              | 3845   | 1.21 | 74.90 | 76.90 | 73.00 | 83.70 | 76.10 | 70.80 | 85.50 |
| 4  | Belgium<br>(Flemish) | 3863   | 1.21 | 73.80 | 77.80 | 70.10 | 82.90 | 78.90 | 70.70 | 80.70 |
| 5  | Belgium<br>(French)  | 3514   | 1.33 | 73.80 | 76.90 | 71.00 | 80.90 | 77.50 | 67.20 | 75.70 |
| 6  | Bulgaria             | 4407   | 1.06 | 38.30 | 35.70 | 40.90 | 41.30 | 34.60 | 30.00 | 42.50 |
| 7  | Canada               | 11461  | .41  | 48.30 | 50.80 | 46.10 | 58.50 | 50.50 | 44.70 | 55.90 |
| 8  | Switzerland          | 6711   | .70  | 75.90 | 77.70 | 74.10 | 81.80 | 77.00 | 74.30 | 78.80 |
| 9  | Czech<br>Republic    | 10475  | .45  | 58.70 | 60.00 | 57.30 | 64.20 | 59.80 | 56.40 | 62.70 |
| 10 | Germany              | 3795   | 1.23 | 72.90 | 72.50 | 73.20 | 77.60 | 75.00 | 65.60 | 83.30 |
| 11 | Denmark              | 2995   | 1.56 | 82.50 | 84.70 | 80.40 | 87.10 | 81.70 | 84.80 | 86.00 |
| 12 | Estonia              | 4483   | 1.04 | 75.50 | 78.20 | 72.80 | 84.20 | 79.30 | 70.90 | 82.70 |
| 13 | Spain                | 4110   | 1.14 | 79.60 | 80.80 | 78.40 | 91.30 | 81.70 | 71.80 | 91.20 |
| 14 | Finland              | 2962   | 1.58 | 68.80 | 72.50 | 65.30 | 81.50 | 70.90 | 66.30 | 76.70 |
| 15 | France               | 7923   | .59  | 72.00 | 74.40 | 69.70 | 78.70 | 74.00 | 68.90 | 78.10 |
| 16 | England              | 2763   | 1.69 | 53.10 | 56.40 | 49.50 | 66.00 | 50.60 | 49.70 | 59.70 |
| 17 | Scotland             | 4589   | 1.02 | 59.50 | 59.30 | 59.70 | 72.40 | 58.10 | 44.50 | 73.00 |
| 18 | Wales                | 12009  | .39  | 61.40 | 64.00 | 59.00 | 72.90 | 64.60 | 54.20 | 72.70 |
| 19 | Georgia              | 3685   | 1.27 | 66.10 | 65.80 | 66.40 | 69.50 | 68.40 | 58.90 | 73.60 |
| 20 | Greece               | 3631   | 1.29 | 77.00 | 80.70 | 73.50 | 86.10 | 81.40 | 74.90 | 84.50 |
| 21 | Croatia              | 4508   | 1.04 | 79.10 | 80.30 | 78.00 | 86.60 | 80.20 | 75.90 | 91.10 |
| 22 | Hungary              | 3538   | 1.32 | 82.20 | 84.70 | 80.10 | 92.20 | 83.90 | 77.40 | 88.90 |
| 23 | Ireland              | 3526   | 1.32 | 61.00 | 61.60 | 60.40 | 68.50 | 59.90 | 55.20 | 69.00 |
| 24 | Iceland              | 6530   | .71  | 71.10 | 71.30 | 70.90 | 79.00 | 72.00 | 62.40 | 81.00 |
| 25 | Italy                | 3914   | 1.19 | 75.70 | 78.00 | 73.60 | 81.40 | 80.10 | 71.40 | 80.80 |
| 26 | Kazakhstan           | 4208   | 1.11 | 80.80 | 79.00 | 82.50 | 82.30 | 79.50 | 74.30 | 84.30 |
| 27 | Lithuania            | 3578   | 1.30 | 72.20 | 74.30 | 70.00 | 82.20 | 72.90 | 66.70 | 80.30 |
| 28 | Luxembourg           | 3712   | 1.26 | 71.60 | 74.80 | 68.50 | 84.10 | 77.30 | 66.20 | 76.90 |
| 29 | Latvia               | 4118   | 1.13 | 66.20 | 67.70 | 64.70 | 73.70 | 66.90 | 62.30 | 76.90 |
| 30 | Moldova              | 4344   | 1.07 | 75.30 | 73.80 | 76.70 | 76.80 | 76.90 | 67.50 | 80.70 |
| 31 | North<br>Macedonia   | 4251   | 1.10 | 89.70 | 89.90 | 89.50 | 90.60 | 91.00 | 88.00 | 94.00 |
| 32 | Malta                | 2252   | 2.07 | 73.10 | 71.10 | 74.90 | 82.20 | 72.20 | 49.00 | 87.10 |
| 33 | Netherlands          | 4444   | 1.05 | 81.20 | 81.70 | 80.70 | 85.20 | 79.60 | 81.00 | 86.80 |
| 34 | Poland               | 4895   | .95  | 59.80 | 61.80 | 57.90 | 78.80 | 58.20 | 48.40 | 75.30 |
| 35 | Portugal             | 5493   | .85  | 79.20 | 81.00 | 77.60 | 88.90 | 80.70 | 74.00 | 87.90 |
| 36 | Romania              | 4283   | 1.09 | 80.80 | 83.30 | 78.50 | 85.90 | 82.60 | 81.90 | 85.00 |
| 37 | Serbia               | 3541   | 1.32 | 84.50 | 83.40 | 85.50 | 92.00 | 83.00 | 79.20 | 94.10 |
| 38 | Russia               | 3907   | 1.19 | 65.00 | 65.80 | 64.30 | 75.80 | 68.80 | 57.30 | 74.50 |
| 39 | Sweden               | 3842   | 1.21 | 79.20 | 81.70 | 76.70 | 86.50 | 81.70 | 78.00 | 83.30 |
| 40 | Slovenia             | 5279   | .88  | 61.10 | 61.80 | 60.50 | 68.70 | 62.20 | 53.80 | 67.70 |
| 41 | Slovakia             | 3121   | 1.49 | 70.10 | 71.40 | 68.90 | 81.40 | 71.70 | 61.30 | 82.10 |
| 42 | Ukraine              | 6053   | .77  | 57.20 | 56.40 | 58.00 | 64.70 | 55.70 | 48.80 | 62.60 |
| 43 | TOTAL                | 195966 |      | 71.28 | 72.41 | 70.19 | 78.90 | 72.36 | 65.76 | 78.77 |

**Table S1.** (Continuation 1)

| No | V10   | V11   | V12   | V13   | V14  | V15   | V16   | V17  | V18   | V19   | V20   |
|----|-------|-------|-------|-------|------|-------|-------|------|-------|-------|-------|
| 1  | 92.20 | 82.40 | 10.40 | 3.80  | 2.70 | 6.30  | 17.50 | 1.10 | 3.30  | 6.40  | 14.80 |
| 2  | 80.60 | 79.40 | 8.40  | .90   | 2.70 | 7.30  | 15.60 | .30  | 1.00  | 1.20  | 12.90 |
| 3  | 72.00 | 63.60 | 6.10  | 7.40  | .90  | 3.00  | 15.60 | .50  | 2.80  | 17.70 | 14.70 |
| 4  | 69.70 | 57.90 | 4.70  | 3.70  | .30  | 2.10  | 12.20 | .50  | 2.00  | 8.90  | 11.90 |
| 5  | 67.60 | 62.30 | 5.20  | 4.10  | 1.60 | 4.90  | 12.60 | .70  | 3.40  | 12.80 | 11.00 |
| 6  | 35.80 | 43.20 | 15.00 | 19.50 | 8.10 | 12.40 | 26.00 | 8.80 | 10.60 | 37.70 | 17.90 |
| 7  | 46.10 | 38.40 | 4.90  | 5.20  | 1.70 | 3.10  | 9.20  | 1.00 | 3.90  | 9.60  | 7.50  |
| 8  | 74.50 | 68.70 | 6.90  | 5.70  | 1.00 | 3.80  | 16.50 | .20  | 3.10  | 14.40 | 15.50 |
| 9  | 58.40 | 51.00 | 7.50  | 9.10  | 1.50 | 5.20  | 15.60 | .40  | 6.50  | 20.60 | 14.10 |
| 10 | 73.70 | 65.50 | 6.50  | 7.50  | .00  | 4.70  | 14.60 | .60  | 4.80  | 15.00 | 14.60 |
| 11 | 75.40 | 77.10 | 6.10  | 4.60  | .80  | 4.20  | 17.70 | .40  | 2.40  | 15.80 | 16.90 |
| 12 | 68.60 | 67.00 | 9.20  | 8.90  | 1.60 | 7.20  | 19.20 | 1.40 | 8.90  | 16.60 | 17.60 |
| 13 | 76.10 | 70.70 | 6.50  | 7.80  | .40  | 2.90  | 14.90 | .30  | 4.80  | 17.00 | 14.50 |
| 14 | 63.00 | 57.40 | 9.60  | 8.20  | 1.30 | 7.70  | 19.00 | .60  | 6.50  | 16.50 | 17.70 |
| 15 | 67.40 | 62.40 | 6.50  | 6.70  | 2.00 | 5.10  | 15.20 | .70  | 4.70  | 17.50 | 13.20 |
| 16 | 45.30 | 39.70 | 4.30  | 5.60  | .80  | 3.60  | 11.10 | .90  | 4.90  | 13.00 | 10.30 |
| 17 | 55.90 | 47.20 | 4.20  | 4.50  | .10  | 3.20  | 10.40 | .50  | 3.40  | 10.20 | 10.30 |
| 18 | 55.50 | 49.40 | 5.20  | 6.50  | 1.50 | 4.40  | 10.70 | 1.00 | 5.30  | 15.60 | 9.20  |
| 19 | 63.30 | 62.30 | 7.10  | 3.30  | 2.60 | 4.00  | 15.60 | 3.40 | 2.10  | 4.40  | 13.00 |
| 20 | 70.90 | 65.40 | 7.50  | 8.30  | 1.00 | 4.70  | 15.90 | .50  | 5.20  | 18.80 | 14.90 |
| 21 | 77.80 | 68.80 | 12.40 | 11.90 | 1.50 | 6.20  | 25.20 | .50  | 6.30  | 24.10 | 23.70 |
| 22 | 80.90 | 70.60 | 8.10  | 11.00 | 2.10 | 4.90  | 20.60 | 1.90 | 5.80  | 25.40 | 18.50 |
| 23 | 60.50 | 51.50 | 3.90  | 3.60  | .30  | 3.00  | 9.60  | .00  | 1.90  | 9.90  | 9.30  |
| 24 | 70.10 | 61.60 | 3.70  | 2.30  | 2.10 | 2.50  | 7.00  | .40  | 1.10  | 5.50  | 4.90  |
| 25 | 73.80 | 65.90 | 9.30  | 13.60 | 1.50 | 5.00  | 23.80 | .40  | 7.10  | 32.90 | 22.30 |
| 26 | 83.50 | 79.70 | 3.70  | 2.40  | 1.90 | 2.70  | 6.80  | 1.90 | 1.90  | 3.50  | 4.90  |
| 27 | 65.00 | 63.70 | 15.30 | 13.90 | 5.10 | 12.60 | 30.60 | 3.20 | 12.10 | 27.50 | 25.50 |
| 28 | 71.10 | 60.30 | 8.10  | 8.10  | .60  | 3.70  | 12.10 | 1.80 | 4.90  | 14.40 | 11.50 |
| 29 | 63.50 | 52.10 | 10.00 | 10.40 | 3.60 | 7.00  | 20.70 | .90  | 8.00  | 24.00 | 17.10 |
| 30 | 78.80 | 70.90 | 6.90  | 2.10  | 2.00 | 4.50  | 14.30 | .80  | 1.00  | 4.60  | 12.30 |
| 31 | 89.50 | 84.70 | 7.90  | 5.00  | 2.00 | 3.30  | 19.20 | .80  | 2.30  | 12.40 | 17.20 |
| 32 | 68.60 | 63.10 | 4.30  | 3.80  | .00  | 1.60  | 14.00 | .40  | 4.50  | 7.60  | 14.00 |
| 33 | 83.00 | 72.50 | 5.80  | 4.70  | .60  | 3.70  | 13.20 | .10  | 1.40  | 12.60 | 12.60 |
| 34 | 55.10 | 45.00 | 8.40  | 9.50  | 3.00 | 6.00  | 16.40 | 1.20 | 6.80  | 19.50 | 13.40 |
| 35 | 75.50 | 71.00 | 5.50  | 4.70  | 1.30 | 3.80  | 11.80 | 1.00 | 3.20  | 9.40  | 10.50 |
| 36 | 76.60 | 74.70 | 11.20 | 10.80 | 2.60 | 7.70  | 22.90 | 1.70 | 7.70  | 22.00 | 20.30 |
| 37 | 86.00 | 79.30 | 9.10  | 9.90  | 2.00 | 3.50  | 17.70 | .90  | 2.40  | 21.90 | 15.70 |
| 38 | 67.00 | 56.40 | 7.50  | 5.10  | 2.90 | 5.40  | 12.20 | 1.30 | 3.80  | 8.40  | 9.30  |
| 39 | 77.00 | 71.80 | 5.70  | 6.50  | 1.60 | 3.80  | 10.60 | .20  | 4.50  | 12.30 | 9.00  |
| 40 | 62.60 | 48.80 | 6.50  | 5.90  | 1.90 | 4.50  | 13.80 | .20  | 2.90  | 16.50 | 11.90 |
| 41 | 66.70 | 57.60 | 10.20 | 9.70  | 2.90 | 9.00  | 20.20 | 1.50 | 9.10  | 22.10 | 17.30 |
| 42 | 57.10 | 53.40 | 9.20  | 4.80  | 3.00 | 5.90  | 19.00 | .90  | 4.40  | 10.10 | 16.00 |
| 43 | 69.09 | 62.72 | 7.49  | 6.93  | 1.84 | 5.00  | 15.88 | 1.09 | 4.59  | 15.15 | 14.04 |

**Table S1.** (Continuation 2)

| No | V21   | V22  | V23   | V24   | V25   | V26  | V27   | V28   | V29    | V30  | V31   |
|----|-------|------|-------|-------|-------|------|-------|-------|--------|------|-------|
| 1  | 5.30  | .000 | 2.694 | 1.718 | 4.225 | .019 | 2.015 | 1.123 | 3.615  | .000 | 4.305 |
| 2  | .90   | .000 | 3.148 | 2.231 | 4.441 | .000 | 2.680 | 1.858 | 3.865  | .007 | 4.134 |
| 3  | 17.20 | .000 | 3.214 | 2.476 | 4.172 | .000 | 2.731 | 1.836 | 4.061  | .000 | 3.617 |
| 4  | 8.40  | .000 | 3.096 | 2.232 | 4.296 | .000 | 2.562 | 1.646 | 3.988  | .000 | 4.353 |
| 5  | 12.10 | .000 | 2.466 | 1.754 | 3.465 | .000 | 2.937 | 1.820 | 4.740  | .002 | 2.129 |
| 6  | 28.90 | .000 | 1.447 | 1.233 | 1.699 | .000 | 1.867 | 1.426 | 2.444  | .023 | 1.266 |
| 7  | 8.60  | .000 | 2.925 | 2.310 | 3.704 | .000 | 2.560 | 1.849 | 3.544  | .000 | 3.391 |
| 8  | 14.20 | .000 | 2.495 | 2.042 | 3.049 | .000 | 1.912 | 1.443 | 2.532  | .000 | 3.481 |
| 9  | 20.20 | .000 | 1.813 | 1.577 | 2.084 | .000 | 1.698 | 1.381 | 2.087  | .000 | 1.896 |
| 10 | 14.40 | .000 | 1.906 | 1.494 | 2.431 | .263 | 1.246 | .848  | 1.830  | .000 | 2.610 |
| 11 | 15.40 | .000 | 1.994 | 1.402 | 2.837 | .097 | 1.555 | .923  | 2.620  | .000 | 2.671 |
| 12 | 15.20 | .000 | 2.102 | 1.709 | 2.586 | .000 | 1.916 | 1.421 | 2.584  | .000 | 2.323 |
| 13 | 16.70 | .000 | 2.607 | 2.049 | 3.317 | .000 | 2.461 | 1.702 | 3.559  | .000 | 2.718 |
| 14 | 15.90 | .000 | 2.802 | 2.163 | 3.630 | .000 | 2.529 | 1.772 | 3.610  | .000 | 3.277 |
| 15 | 16.80 | .000 | 2.213 | 1.844 | 2.655 | .000 | 2.085 | 1.588 | 2.736  | .000 | 2.300 |
| 16 | 12.10 | .000 | 2.463 | 1.707 | 3.553 | .012 | 1.977 | 1.163 | 3.359  | .000 | 2.881 |
| 17 | 9.70  | .000 | 3.090 | 2.257 | 4.231 | .000 | 3.726 | 2.298 | 6.044  | .000 | 2.665 |
| 18 | 14.60 | .000 | 2.440 | 2.059 | 2.892 | .000 | 2.178 | 1.675 | 2.832  | .000 | 2.584 |
| 19 | 1.00  | .000 | 1.726 | 1.298 | 2.295 | .000 | 1.872 | 1.319 | 2.657  | .139 | 1.450 |
| 20 | 18.30 | .000 | 2.121 | 1.654 | 2.721 | .004 | 1.786 | 1.205 | 2.648  | .000 | 2.333 |
| 21 | 23.60 | .000 | 2.579 | 2.154 | 3.089 | .000 | 2.266 | 1.742 | 2.947  | .000 | 2.943 |
| 22 | 23.50 | .000 | 2.565 | 1.968 | 3.343 | .003 | 2.089 | 1.275 | 3.424  | .000 | 2.647 |
| 23 | 9.90  | .000 | 2.834 | 1.935 | 4.149 | .000 | 3.127 | 1.846 | 5.296  | .001 | 2.523 |
| 24 | 5.10  | .000 | 3.969 | 2.906 | 5.419 | .000 | 3.970 | 2.647 | 5.956  | .000 | 3.909 |
| 25 | 32.50 | .000 | 2.343 | 1.929 | 2.846 | .000 | 2.076 | 1.496 | 2.880  | .000 | 2.427 |
| 26 | 1.60  | .000 | 2.996 | 2.092 | 4.289 | .000 | 2.314 | 1.450 | 3.692  | .000 | 4.208 |
| 27 | 24.30 | .000 | 1.700 | 1.418 | 2.038 | .002 | 1.499 | 1.158 | 1.940  | .000 | 1.956 |
| 28 | 12.60 | .000 | 2.267 | 1.786 | 2.876 | .000 | 2.331 | 1.660 | 3.273  | .000 | 2.223 |
| 29 | 23.10 | .000 | 2.653 | 2.167 | 3.247 | .000 | 2.210 | 1.661 | 2.940  | .000 | 3.201 |
| 30 | 3.80  | .000 | 2.588 | 1.933 | 3.463 | .000 | 2.443 | 1.752 | 3.407  | .001 | 2.693 |
| 31 | 11.60 | .000 | 3.296 | 2.479 | 4.382 | .000 | 2.458 | 1.645 | 3.671  | .000 | 4.715 |
| 32 | 7.20  | .000 | 4.028 | 2.521 | 6.436 | .000 | 4.852 | 2.254 | 10.447 | .000 | 3.541 |
| 33 | 12.50 | .000 | 2.170 | 1.647 | 2.860 | .002 | 1.840 | 1.247 | 2.714  | .000 | 2.638 |
| 34 | 18.30 | .000 | 2.443 | 2.000 | 2.983 | .000 | 2.058 | 1.533 | 2.763  | .000 | 2.828 |
| 35 | 8.40  | .000 | 3.241 | 2.550 | 4.121 | .000 | 2.793 | 1.994 | 3.912  | .000 | 3.871 |
| 36 | 20.30 | .000 | 2.315 | 1.881 | 2.850 | .000 | 1.814 | 1.318 | 2.496  | .000 | 2.842 |
| 37 | 21.00 | .000 | 2.934 | 2.322 | 3.707 | .000 | 2.806 | 1.989 | 3.958  | .000 | 2.981 |
| 38 | 7.10  | .000 | 2.541 | 1.934 | 3.339 | .000 | 2.673 | 1.874 | 3.813  | .000 | 2.415 |
| 39 | 12.10 | .000 | 3.092 | 2.350 | 4.069 | .000 | 3.109 | 2.063 | 4.683  | .000 | 3.064 |
| 40 | 16.30 | .000 | 3.038 | 2.392 | 3.858 | .000 | 2.534 | 1.831 | 3.507  | .000 | 3.727 |
| 41 | 20.60 | .000 | 2.593 | 2.053 | 3.275 | .000 | 2.473 | 1.769 | 3.456  | .000 | 2.697 |
| 42 | 9.20  | .012 | 1.378 | 1.072 | 1.771 | .000 | 1.819 | 1.398 | 2.367  | .000 | 4.011 |
| 43 | 14.06 | .000 | 1.991 | 1.918 | 2.067 | .000 | 1.807 | 1.714 | 1.905  | .000 | 2.194 |

**Table S1.** (Continuation 3)

| No | V32   | V33    | V34  | V35   | V36   | V37    | V38  | V39    | V40   | V41    | V42  |
|----|-------|--------|------|-------|-------|--------|------|--------|-------|--------|------|
| 1  | 2.074 | 8.933  | .062 | 5.747 | .916  | 36.057 | .784 | 1.383  | .136  | 14.028 | .157 |
| 2  | 1.470 | 11.628 | .046 | 4.645 | 1.027 | 20.998 | .000 | 3.782  | 1.937 | 7.386  | .005 |
| 3  | 2.548 | 5.133  | .779 | 1.393 | .138  | 14.049 | .000 | 6.953  | 2.402 | 20.129 | .017 |
| 4  | 2.603 | 7.281  |      |       |       |        | .089 | 3.004  | .846  | 10.667 | .031 |
| 5  | 1.312 | 3.456  | .008 | 5.087 | 1.544 | 16.765 | .117 | 2.175  | .823  | 5.747  | .058 |
| 6  | 1.034 | 1.550  | .146 | 1.514 | .865  | 2.649  | .001 | 3.025  | 1.591 | 5.749  | .038 |
| 7  | 2.395 | 4.802  | .013 | 5.168 | 1.417 | 18.853 | .004 | 2.642  | 1.352 | 5.162  | .001 |
| 8  | 2.588 | 4.683  | .014 | 4.159 | 1.337 | 12.936 | .002 | 2.768  | 1.458 | 5.255  | .040 |
| 9  | 1.568 | 2.291  | .006 | 3.346 | 1.416 | 7.905  | .059 | 1.517  | .985  | 2.336  | .001 |
| 10 | 1.891 | 3.603  |      |       |       |        | .756 | 1.132  | .518  | 2.471  | .951 |
| 11 | 1.631 | 4.374  |      |       |       | .000   | .002 | 4.296  | 1.736 | 10.634 | .943 |
| 12 | 1.734 | 3.111  | .652 | 1.428 | .304  | 6.719  | .001 | 2.744  | 1.547 | 4.867  | .203 |
| 13 | 1.974 | 3.742  |      |       |       | .000   | .000 | 5.487  | 2.254 | 13.358 | .187 |
| 14 | 2.225 | 4.826  | .802 | 1.340 | .136  | 13.166 | .175 | 1.575  | .817  | 3.038  | .000 |
| 15 | 1.795 | 2.947  | .000 | 6.731 | 2.667 | 16.989 | .186 | 1.411  | .847  | 2.349  | .005 |
| 16 | 1.717 | 4.835  | .963 | 1.068 | .067  | 17.095 | .595 | .765   | .284  | 2.056  | .009 |
| 17 | 1.760 | 4.036  |      |       |       |        | .006 | 4.154  | 1.499 | 11.512 | .018 |
| 18 | 2.064 | 3.234  | .087 | 2.439 | .878  | 6.774  | .001 | 2.277  | 1.409 | 3.680  | .035 |
| 19 | .886  | 2.374  | .641 | .763  | .245  | 2.376  | .046 | 2.168  | 1.013 | 4.637  | .018 |
| 20 | 1.680 | 3.240  |      |       |       |        | .067 | 2.128  | .948  | 4.776  | .170 |
| 21 | 2.292 | 3.780  | .090 | 4.511 | .790  | 25.747 | .000 | 3.430  | 1.757 | 6.696  | .001 |
| 22 | 1.922 | 3.644  | .654 | 1.628 | .194  | 13.696 | .010 | 3.579  | 1.348 | 9.502  | .492 |
| 23 | 1.452 | 4.386  | .619 | 2.023 | .126  | 32.490 | .067 | 2.564  | .937  | 7.020  | .005 |
| 24 | 2.397 | 6.375  | .001 | 4.187 | 1.735 | 10.105 | .000 | 6.676  | 2.604 | 17.115 | .000 |
| 25 | 1.899 | 3.101  | .396 | 1.840 | .450  | 7.525  | .054 | 2.225  | .987  | 5.015  | .025 |
| 26 | 2.381 | 7.439  | .205 | 2.036 | .678  | 6.114  | .014 | 3.056  | 1.254 | 7.446  | .174 |
| 27 | 1.511 | 2.533  | .434 | 1.405 | .599  | 3.296  | .515 | 1.179  | .719  | 1.932  | .153 |
| 28 | 1.588 | 3.113  | .332 | 3.456 | .282  | 42.291 | .200 | 1.863  | .720  | 4.822  | .001 |
| 29 | 2.395 | 4.279  | .004 | 3.440 | 1.490 | 7.942  | .062 | 1.726  | .973  | 3.063  | .000 |
| 30 | 1.470 | 4.932  | .303 | 1.786 | .592  | 5.390  | .000 | 4.351  | 2.101 | 9.012  | .010 |
| 31 | 3.115 | 7.137  | .002 | 7.627 | 2.134 | 27.261 | .400 | 1.659  | .511  | 5.384  | .002 |
| 32 | 1.935 | 6.478  |      |       |       |        | .302 | 3.642  | .313  | 42.421 | .109 |
| 33 | 1.780 | 3.911  | .115 | 4.963 | .676  | 36.441 | .001 | 3.892  | 1.795 | 8.442  | .537 |
| 34 | 2.146 | 3.727  | .008 | 3.135 | 1.343 | 7.320  | .724 | 1.114  | .613  | 2.024  | .020 |
| 35 | 2.739 | 5.472  | .590 | 1.530 | .326  | 7.187  | .000 | 3.271  | 1.701 | 6.289  | .018 |
| 36 | 2.146 | 3.764  | .004 | 4.551 | 1.628 | 12.722 | .036 | 2.064  | 1.049 | 4.062  | .224 |
| 37 | 2.164 | 4.106  | .559 | 1.896 | .222  | 16.182 | .000 | 10.679 | 3.536 | 32.250 | .002 |
| 38 | 1.575 | 3.703  | .012 | 3.929 | 1.353 | 11.412 | .001 | 3.221  | 1.573 | 6.594  | .006 |
| 39 | 2.113 | 4.442  |      |       |       |        | .033 | 2.598  | 1.082 | 6.236  | .000 |
| 40 | 2.606 | 5.329  | .478 | 1.522 | .477  | 4.853  | .000 | 4.789  | 2.148 | 10.674 | .004 |
| 41 | 1.945 | 3.741  | .031 | 4.527 | 1.150 | 17.815 | .006 | 2.172  | 1.256 | 3.758  | .012 |
| 42 | 2.739 | 5.874  | .006 | 3.577 | 1.443 | 8.867  | .006 | 2.201  | 1.249 | 3.877  | .232 |
| 43 | 2.081 | 2.314  | .000 | 2.930 | 2.427 | 3.536  | .000 | 2.385  | 2.137 | 2.663  | .000 |

**Table S1.** (Continuation 5)

| No | V43   | V44   | V45   | V46  | V47    | V48   | V49     | V50  | V51    | V52   | V53    |
|----|-------|-------|-------|------|--------|-------|---------|------|--------|-------|--------|
| 1  | 1.606 | .833  | 3.097 | .006 | 28.964 | 2.626 | 319.472 | .411 | 2.518  | .278  | 22.807 |
| 2  | 1.989 | 1.235 | 3.203 |      |        |       |         | .008 | 9.345  | 1.800 | 48.500 |
| 3  | 1.751 | 1.107 | 2.771 |      |        |       |         | .001 | 5.858  | 2.052 | 16.722 |
| 4  | 1.697 | 1.049 | 2.744 | .061 | 8.922  | .907  | 87.784  | .086 | 3.193  | .849  | 12.001 |
| 5  | 1.875 | .979  | 3.591 | .677 | 1.444  | .257  | 8.120   | .955 | 1.034  | .332  | 3.218  |
| 6  | 1.456 | 1.021 | 2.076 | .004 | 2.218  | 1.282 | 3.839   | .079 | 1.713  | .939  | 3.128  |
| 7  | 1.945 | 1.304 | 2.901 |      |        |       |         | .003 | 2.648  | 1.383 | 5.067  |
| 8  | 1.411 | 1.016 | 1.960 | .099 | 7.765  | .678  | 88.920  | .000 | 3.475  | 1.729 | 6.986  |
| 9  | 1.488 | 1.165 | 1.901 | .302 | 2.201  | .491  | 9.858   | .001 | 1.935  | 1.308 | 2.863  |
| 10 | 1.014 | .649  | 1.584 | .114 | 4.864  | .684  | 34.582  | .000 | 4.434  | 2.002 | 9.822  |
| 11 | .974  | .470  | 2.017 |      |        |       |         | .000 | 10.966 | 2.959 | 40.633 |
| 12 | 1.267 | .880  | 1.823 | .954 | 1.047  | .216  | 5.076   | .000 | 3.149  | 1.862 | 5.327  |
| 13 | 1.321 | .874  | 1.999 | .210 | 5.889  | .368  | 94.149  | .002 | 2.934  | 1.499 | 5.741  |
| 14 | 2.329 | 1.503 | 3.608 |      |        |       |         | .000 | 4.358  | 1.941 | 9.782  |
| 15 | 1.665 | 1.169 | 2.372 | .542 | 1.753  | .288  | 10.662  | .000 | 2.969  | 1.856 | 4.750  |
| 16 | 2.469 | 1.259 | 4.842 | .125 | 5.561  | .621  | 49.837  | .283 | 1.682  | .651  | 4.349  |
| 17 | 1.954 | 1.121 | 3.404 | .050 | 9.242  | 1.003 | 85.124  | .297 | 1.521  | .692  | 3.342  |
| 18 | 1.436 | 1.026 | 2.009 | .147 | 2.663  | .708  | 10.021  | .000 | 3.314  | 2.058 | 5.337  |
| 19 | 1.690 | 1.095 | 2.608 | .748 | 1.158  | .473  | 2.836   | .660 | 1.269  | .439  | 3.665  |
| 20 | 1.375 | .872  | 2.167 | .384 | 2.916  | .262  | 32.462  | .075 | 1.852  | .939  | 3.651  |
| 21 | 1.648 | 1.230 | 2.209 | .144 | 6.019  | .543  | 66.764  | .000 | 3.480  | 1.801 | 6.724  |
| 22 | 1.238 | .674  | 2.276 |      |        |       |         | .001 | 3.342  | 1.610 | 6.938  |
| 23 | 2.525 | 1.329 | 4.797 |      |        |       |         | .031 | 4.320  | 1.142 | 16.351 |
| 24 | 2.575 | 1.516 | 4.373 | .045 | 10.254 | 1.051 | 100.037 | .002 | 11.071 | 2.358 | 51.973 |
| 25 | 1.532 | 1.054 | 2.226 | .313 | 4.186  | .259  | 67.753  | .000 | 3.351  | 1.853 | 6.058  |
| 26 | 1.558 | .822  | 2.955 | .000 | 9.753  | 2.815 | 33.790  | .338 | 1.776  | .549  | 5.751  |
| 27 | 1.270 | .915  | 1.764 | .609 | .726   | .213  | 2.477   | .047 | 1.679  | 1.007 | 2.800  |
| 28 | 2.349 | 1.424 | 3.876 | .037 | 4.656  | 1.101 | 19.696  | .150 | 1.752  | .816  | 3.761  |
| 29 | 1.902 | 1.330 | 2.720 | .053 | 4.644  | .981  | 21.981  | .000 | 3.052  | 1.724 | 5.403  |
| 30 | 1.692 | 1.133 | 2.528 | .012 | 16.513 | 1.835 | 148.631 | .774 | .728   | .084  | 6.319  |
| 31 | 2.041 | 1.297 | 3.211 |      |        |       |         | .001 | 6.848  | 2.124 | 22.083 |
| 32 | 1.953 | .862  | 4.429 | .137 | 8.196  | .511  | 131.436 | .061 | 2.656  | .957  | 7.369  |
| 33 | 1.167 | .715  | 1.905 |      |        |       |         | .204 | 2.390  | .623  | 9.167  |
| 34 | 1.567 | 1.075 | 2.285 | .218 | 2.300  | .611  | 8.662   | .000 | 3.698  | 2.046 | 6.683  |
| 35 | 1.820 | 1.106 | 2.995 | .002 | 7.540  | 2.113 | 26.900  | .000 | 3.768  | 1.895 | 7.494  |
| 36 | 1.288 | .857  | 1.935 | .444 | 1.851  | .382  | 8.969   | .000 | 4.290  | 2.415 | 7.622  |
| 37 | 1.842 | 1.259 | 2.697 | .006 | 17.077 | 2.274 | 128.244 | .116 | 3.292  | .745  | 14.546 |
| 38 | 1.874 | 1.202 | 2.923 | .833 | .783   | .080  | 7.678   | .011 | 3.219  | 1.313 | 7.891  |
| 39 | 3.495 | 2.148 | 5.687 |      |        |       |         | .001 | 4.106  | 1.841 | 9.155  |
| 40 | 1.744 | 1.192 | 2.553 |      |        |       |         | .035 | 2.352  | 1.063 | 5.200  |
| 41 | 1.760 | 1.130 | 2.742 | .887 | 1.174  | .130  | 10.588  | .001 | 2.527  | 1.489 | 4.289  |
| 42 | 1.213 | .884  | 1.664 | .019 | 12.432 | 1.525 | 101.350 | .000 | 3.887  | 2.005 | 7.537  |
| 43 | 1.568 | 1.472 | 1.671 | .000 | 3.988  | 3.168 | 5.020   | .000 | 3.158  | 2.815 | 3.542  |

**Table S1.** (Continuation 6)

| No | V54  | V55   | V56   | V57    |
|----|------|-------|-------|--------|
| 1  | .016 | 2.901 | 1.222 | 6.887  |
| 2  | .226 | 2.594 | .554  | 12.143 |
| 3  | .000 | 2.144 | 1.463 | 3.143  |
| 4  | .001 | 2.656 | 1.482 | 4.762  |
| 5  | .012 | 2.092 | 1.174 | 3.728  |
| 6  | .195 | 1.170 | .923  | 1.484  |
| 7  | .000 | 2.547 | 1.678 | 3.866  |
| 8  | .000 | 2.678 | 1.922 | 3.733  |
| 9  | .000 | 1.491 | 1.196 | 1.857  |
| 10 | .012 | 1.599 | 1.107 | 2.310  |
| 11 | .110 | 1.604 | .898  | 2.865  |
| 12 | .050 | 1.462 | 1.001 | 2.135  |
| 13 | .006 | 1.671 | 1.156 | 2.415  |
| 14 | .004 | 1.933 | 1.233 | 3.032  |
| 15 | .007 | 1.506 | 1.116 | 2.032  |
| 16 | .028 | 2.069 | 1.080 | 3.964  |
| 17 | .010 | 1.996 | 1.176 | 3.387  |
| 18 | .000 | 1.627 | 1.251 | 2.116  |
| 19 | .081 | 1.942 | .922  | 4.090  |
| 20 | .007 | 1.696 | 1.159 | 2.482  |
| 21 | .000 | 1.781 | 1.353 | 2.343  |
| 22 | .004 | 1.707 | 1.186 | 2.459  |
| 23 | .157 | 1.557 | .843  | 2.874  |
| 24 | .007 | 2.110 | 1.224 | 3.638  |
| 25 | .001 | 1.600 | 1.217 | 2.104  |
| 26 | .000 | 4.821 | 2.098 | 11.079 |
| 27 | .001 | 1.709 | 1.239 | 2.356  |
| 28 | .033 | 1.601 | 1.038 | 2.468  |
| 29 | .000 | 1.962 | 1.391 | 2.768  |
| 30 | .065 | 1.951 | .960  | 3.963  |
| 31 | .000 | 2.864 | 1.832 | 4.479  |
| 32 | .109 | 1.901 | .866  | 4.175  |
| 33 | .008 | 1.766 | 1.163 | 2.681  |
| 34 | .007 | 1.558 | 1.127 | 2.153  |
| 35 | .000 | 2.510 | 1.510 | 4.171  |
| 36 | .000 | 1.988 | 1.410 | 2.805  |
| 37 | .000 | 1.907 | 1.371 | 2.652  |
| 38 | .012 | 1.915 | 1.154 | 3.178  |
| 39 | .000 | 2.331 | 1.526 | 3.560  |
| 40 | .000 | 2.652 | 1.770 | 3.974  |
| 41 | .008 | 1.792 | 1.166 | 2.753  |
| 42 | .000 | 3.122 | 1.931 | 5.050  |
| 43 | .000 | 1.886 | 1.773 | 2.007  |

Note: List of variables and their labels

| <b>Variable</b> | <b>Label</b>                                                  |
|-----------------|---------------------------------------------------------------|
| V1              | Number of subjects in the country                             |
| V2              | Coefficient for weighing by countries                         |
| V3              | Percentage of high family support in total sample             |
| V4              | Percentage of high family support in boys, 11, 13 & 15 years  |
| V5              | Percentage of high family support in girls, 11, 13 & 15 years |
| V6              | Percentage of high family support in boys, 11 years           |
| V7              | Percentage of high family support in boys, 13 years           |
| V8              | Percentage of high family support in boys, 15 years           |
| V9              | Percentage of high family support in girls, 11 years          |
| V10             | Percentage of high family support in girls, 13 years          |
| V11             | Percentage of high family support in girls, 15 years          |
| V12             | Smoking prevalence, all ages, boys                            |
| V13             | Smoking prevalence, all ages, girls                           |
| V14             | Smoking prevalence, 11 boys                                   |
| V15             | Smoking prevalence, 13 boys                                   |
| V16             | Smoking prevalence, 15 boys                                   |
| V17             | Smoking prevalence, 11 girls                                  |
| V18             | Smoking prevalence, 13 girls                                  |
| V19             | Smoking prevalence, 15 girls                                  |
| V20             | Smoking prevalence, difference 15-11 boys                     |
| V21             | Smoking prevalence, difference 15-11 girls                    |
| V22             | Prevalence ratio (PR), total sample, p-value                  |
| V23             | PR, total sample, PR-value                                    |
| V24             | PR, total sample, 95% CI min-value                            |
| V25             | PR, Total sample, 95% CI max-value                            |
| V26             | PR, boys, p-value                                             |
| V27             | PR, boys, PR-value                                            |
| V28             | PR, boys, 95% CI min-value                                    |
| V29             | PR, boys, 95% CI max-value                                    |
| V30             | PR, girls, p-value                                            |
| V31             | PR, girls, PR-value                                           |
| V32             | PR, girls, 95% CI min-value                                   |
| V33             | PR, girls, 95% CI max-value                                   |
| V34             | PR, boys, 11 years, p-value                                   |
| V35             | PR, boys, 11 years, PR-value                                  |
| V36             | PR, boys, 11 years, 95% CI min-value                          |
| V37             | PR, boys, 11 years, 95% CI max-value                          |
| V38             | PR, boys, 13 years, p-value                                   |
| V39             | PR, boys, 13 years, PR-value                                  |
| V40             | PR, boys, 13 years, 95% CI min-value                          |
| V41             | PR, boys, 13 years, 95% CI max-value                          |
| V42             | PR, boys, 15 years, p-value                                   |
| V43             | PR, boys, 15 years, PR-value                                  |

| Variable | Label                                       |
|----------|---------------------------------------------|
| V44      | PR, boys, 15 years, 95% CI min-value        |
| V45      | PR, boys, 15 years, 95% CI max-value        |
| V46      | PR, girls, 11 years, p-value                |
| V47      | PR, girls, 11 years, PR-value               |
| V48      | PR, girls, 11 years, 95% CI min             |
| V49      | PR, girls, 11 years, 95% CI max             |
| V50      | PR, girls, 13 years, p-value                |
| V51      | PR, girls, 13 years, PR-value               |
| V52      | PR, girls, 13 years, 95% CI min-value       |
| V53      | PR, girls, 13 years, 95% CI max-value       |
| V54      | PR, girls, 15 years, p-value                |
| V55      | PR, girls, 15 years, PR-value               |
| V56      | PR, girls, 15 years, 95% CI min-value       |
| V57      | PR, girls, 15 years, 95% CI max-value-value |
